# Supplementary material for: Construction of mixed micelle with cross-linked core and dual responsive shells
Source: Royal Society of Chemistry journal article supplement (doi:10.1039/c0py00373e), 2011-01-01
Supplement: c0py00373e.pdf [file c0py00373e.pdf]

Supplementary Information for:

## **Construction of mixed micelle with cross-linked core and dual responsive shells**

Cong Chang, Hua Wei, Qian Li, Bin Yang, Ni Chen, Jin-Ping Zhou,

Xian-Zheng Zhang,<sup>\*</sup> and Ren-Xi Zhuo

*Key Laboratory of Biomedical Polymers of Ministry of Education & Department of  
Chemistry, Wuhan University, Wuhan 430072, P. R. China*

<sup>\*</sup> *E-mail: xz-zhang@whu.edu.cn; Fax/Tel: +86-27-68754509*

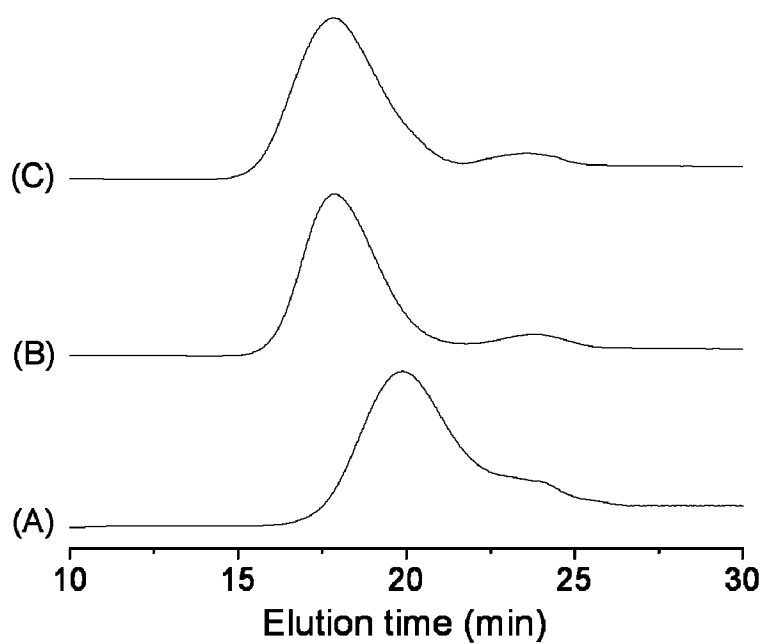

**Fig. S1.** SEC traces of (A) P(MMA<sub>285-co</sub>-MPMA<sub>5</sub>), (B) P(MMA<sub>285-co</sub>-MPMA<sub>5</sub>)-*b*-PNIPAAm<sub>351</sub>, and (C) P(MMA<sub>285-co</sub>-MPMA<sub>5</sub>)-*b*-PDEA<sub>290</sub>.
